# Supplementary material
Source: MDPI journal article supplement (https://www.mdpi.com/1424-8247/16/7/968)
Supplement: s1 [file s1]

# Application of Ligand- and Structure-Based Prediction Models for the Design of Alkylhydrazide-Based HDAC3 Inhibitors as Novel Anti-Cancer Compounds

Emre F. Bülbül <sup>1</sup>, Dina Robaa <sup>1</sup>, Ping Sun <sup>1</sup>, Fereshteh Mahmoudi <sup>1</sup>, Jelena Melesina <sup>1</sup>, Matthes Zessin <sup>2</sup>, Mike Schutkowski <sup>2</sup> and Wolfgang Sippl <sup>1,\*</sup>

## Table of contents

|    | Topic                                                                                                                                | Page       |
|----|--------------------------------------------------------------------------------------------------------------------------------------|------------|
| 1  | <b>Figure S1.</b> Atom-based 3D-QSAR models for the training set                                                                     | <b>S2</b>  |
| 2  | <b>Figure S2.</b> Docking poses of training, external test and inactive set                                                          | <b>S3</b>  |
| 3  | <b>Figure S3.</b> 100 ns MD results for the HDAC3- compound <b>1</b> complex                                                         | <b>S4</b>  |
| 4  | <b>Figure S4.</b> Analysis of hydrogen bond distances for the HDAC3- compound <b>1</b> complex from 100 ns MD simulation             | <b>S5</b>  |
| 5  | <b>Figure S5.</b> 100 ns MD results for the HDAC3- compound <b>2</b> complex                                                         | <b>S6</b>  |
| 6  | <b>Figure S6.</b> Analysis of hydrogen bond distances for the HDAC3- compound <b>2</b> complex from 100 ns MD simulation             | <b>S7</b>  |
| 7  | <b>Table S1.</b> 2D chemical structures and biological data of compounds in training set, external test set and inactive set         | <b>S8</b>  |
| 8  | <b>Table S2.</b> Prediction values of the best atom-based QSAR model generated for training set, test set and inactive set for HDAC3 | <b>S16</b> |
| 9  | <b>Table S3.</b> Prediction values of the best BFE model generated for training set, test set and inactive set for HDAC3             | <b>S19</b> |
| 10 | <b>Table S4.</b> 2D chemical structures and biological data of different test set                                                    | <b>S22</b> |
| 11 | <b>Table S5.</b> Prediction values of the best atom-based QSAR model generated for test set for HDAC3                                | <b>S27</b> |
| 12 | <b>Table S6.</b> Prediction values of the best BFE model generated for test set for HDAC3                                            | <b>S29</b> |

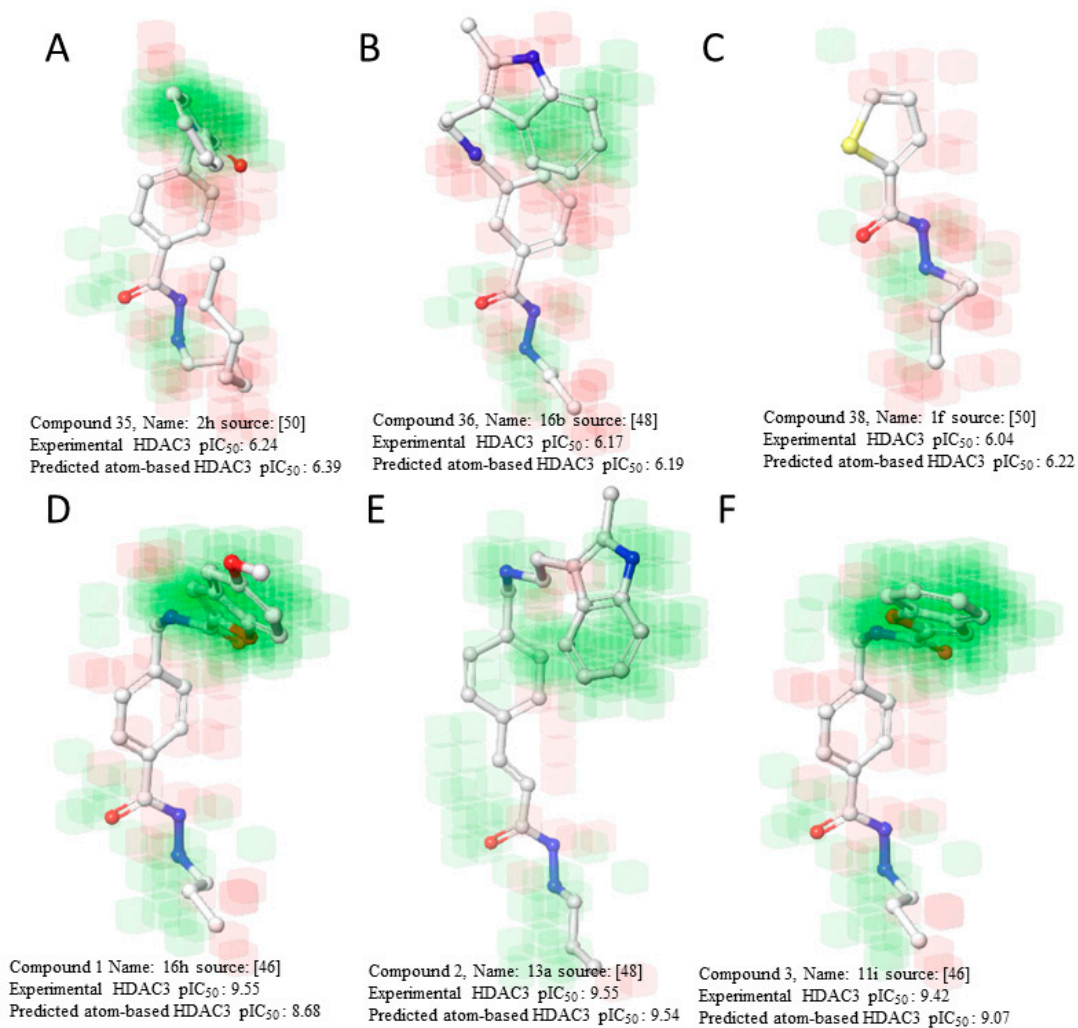

**Figure S1.** Visualization of Atom-based 3D-QSAR model in training set. A) Compound 35 [50] B) Compound 36 [48] , C) Compound 38 [50], D) Compound 1 [46] E) Compound 2 [48] F) Compound 3 [46]. Favorable regions shown as green color, unfavorable regions as red color.

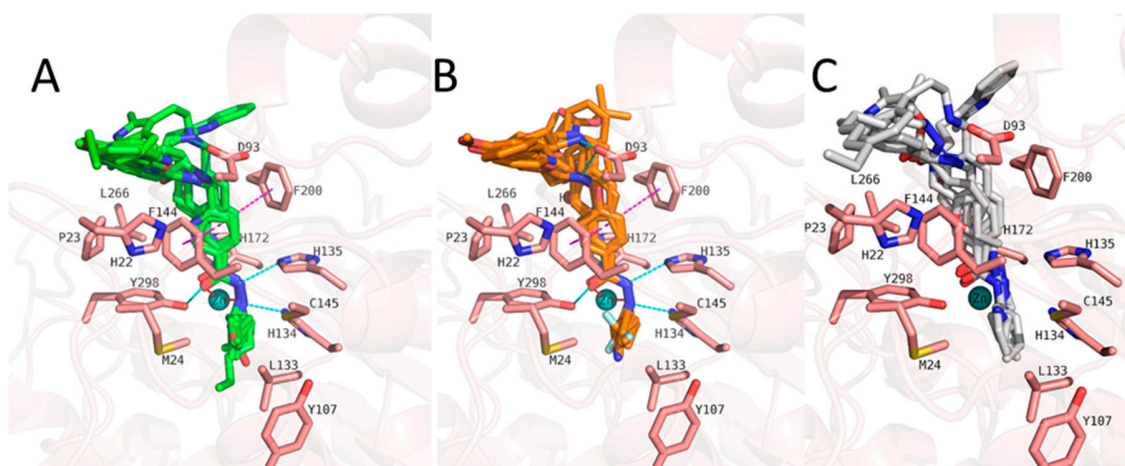

**Figure S2.** Docking poses of **training set** (39 compounds, A, green colored sticks), **external test set** (17 compounds, B, orange colored sticks), **inactive set** (7 compounds, C, gray colored sticks) in HDAC3 (PDB ID: 4A69). Hydrogen bonds (cyan dashed lines), hydrophobic interactions (magenta dashed lines) and metal coordination (red dashed lines) between inhibitors and protein are shown. Relevant residues are shown in stick representation with salmon carbon atoms in HDAC3. The zinc ion is shown as cyan colored sphere.

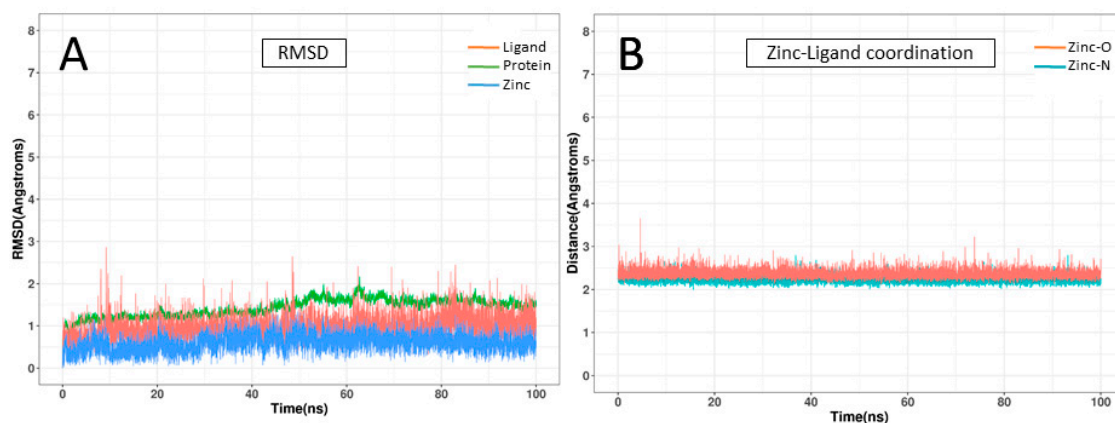

**Figure S3.** 100 ns MD results for the HDAC3- compound **1** complex (PDB ID: 4A69). A) RMSD plot for the HDAC3- compound **1** complex. The ligand is represented as red line, the backbone atoms of the protein as green line, and the zinc ion as blue line. B) The distance between zinc and free amino group of ligand (cyan lines) and the distance between zinc and carbonyl oxygen of ligand (red lines)

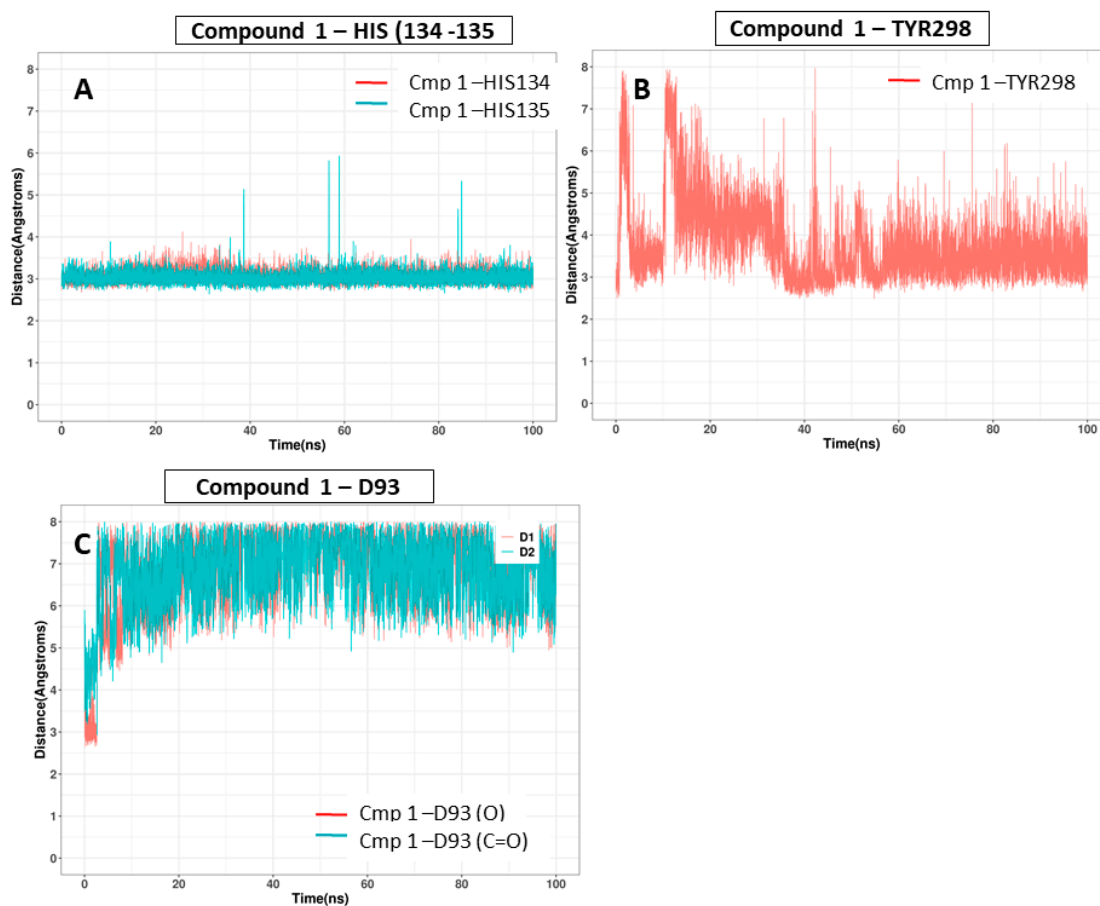

**Figure S4.** Hydrogen bond distance analysis of 100ns MD results for the HDAC3-1 complex. A) RMSD plot for the HDAC3- compound **1** complex. A) Distance analysis of compound **1** – HIS134 (red lines) and compound **1** – HIS135 (cyan lines) B) Distance analysis of ligand – TYR298 (red lines) and compound **1** – HIS135 (cyan lines). C) Distance analysis of compound **1** – D93 (O – red lines, C=O cyan lines).

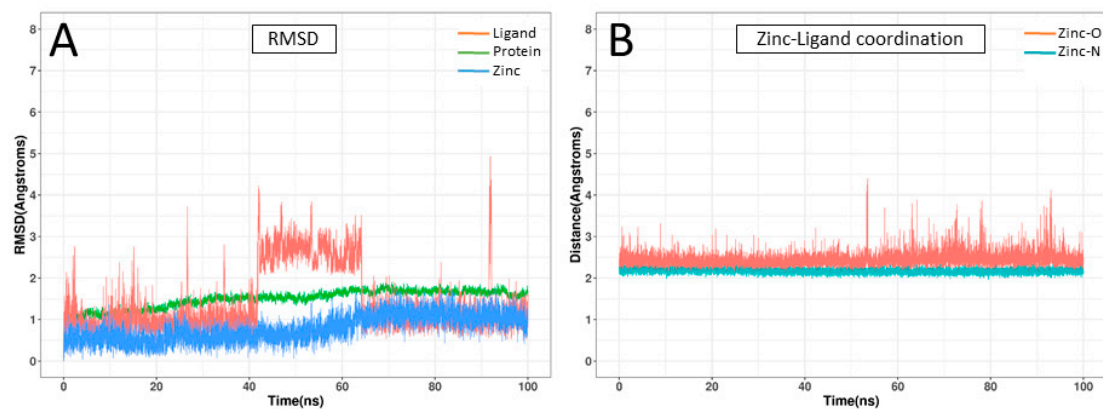

**Figure S5.** 100 ns MD results for the HDAC3- compound **2** complex (PDB ID: 4A69). A) RMSD plot for the HDAC3- compound **2** complex. A) The ligand is represented as red line, the backbone atoms of the protein as green line, and the zinc ion as blue line. B) The distance between zinc and free amino group of ligand (cyan lines) and the distance between zinc and carbonyl oxygen of ligand (red lines)

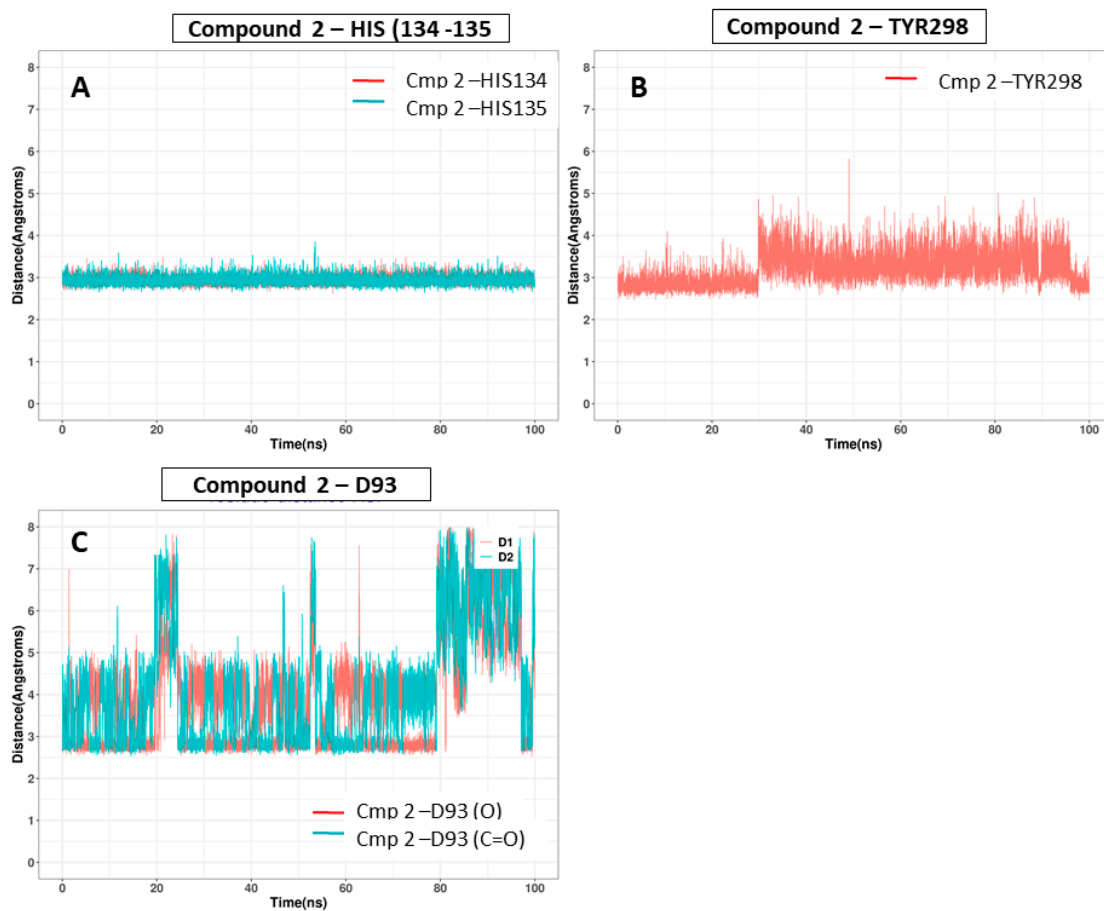

**Figure S6.** Hydrogen bond distance analysis of 100 ns MD results for the HDAC3-2 complex (PDB ID: 4A69). A) RMSD plot for the HDAC3-2 complex. A) Distance analysis of compound **2** – HIS134 (red lines) and compound **2** – HIS135 (cyan lines) B) Distance analysis of compound **2** – TYR298 (red lines) and compound **2** – HIS135 (cyan lines). C) Distance analysis of compound **2** – D93 (O – red lines, C=O cyan lines).

**Table S1.** 2D chemical structures and biological data of compounds in training set, external test set and inactive set.

| Compound number | Molecular structure – ID in the original article                                           | Class    | HDAC3 experimental pIC <sub>50</sub> | Ref. |
|-----------------|--------------------------------------------------------------------------------------------|----------|--------------------------------------|------|
| 1               | 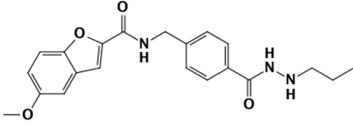<br>16h   | training | 9.55                                 | [46] |
| 2               | <br>13a   | training | 9.55                                 | [48] |
| 3               | <br>11i  | training | 9.42                                 | [46] |
| 4               | <br>11h | training | 9.36                                 | [46] |
| 5               | <br>16f | training | 9.21                                 | [46] |
| 6               | <br>16b | training | 9.18                                 | [46] |
| 7               | <br>16e | training | 9.08                                 | [46] |



|    |                                                                                                |          |      |      |
|----|------------------------------------------------------------------------------------------------|----------|------|------|
| 8  | 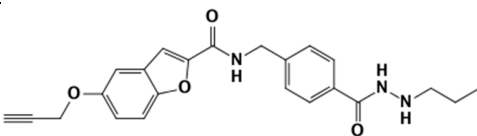 <p>11n</p>   | training | 9.07 | [46] |
| 9  |  <p>11d</p>   | training | 9.05 | [46] |
| 10 |  <p>3b</p>    | training | 9.02 | [50] |
| 11 |  <p>11e</p>  | training | 8.99 | [46] |
| 12 |  <p>11l</p> | training | 8.88 | [46] |
| 13 |  <p>16c</p> | training | 8.88 | [46] |
| 14 |  <p>11k</p> | training | 8.84 | [46] |
| 15 |  <p>11c</p> | training | 8.83 | [46] |

|    |                                                                                                |          |      |      |
|----|------------------------------------------------------------------------------------------------|----------|------|------|
| 16 | 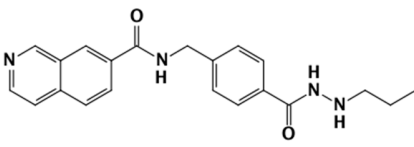 <p>11f</p>   | training | 8.81 | [46] |
| 17 |  <p>16a</p>   | training | 8.79 | [46] |
| 18 |  <p>11b</p>   | training | 8.75 | [46] |
| 19 |  <p>11g</p>   | training | 8.69 | [46] |
| 20 |  <p>2d</p>  | training | 8.46 | [50] |
| 21 |  <p>3c</p>  | training | 8.44 | [50] |
| 22 |  <p>24a</p> | training | 8.21 | [48] |
| 23 |  <p>11</p>  | training | 8.07 | [50] |
| 24 |  <p>2e</p>  | training | 7.73 | [50] |

|    |         |          |      |      |
|----|---------|----------|------|------|
| 25 | <br>3a  | training | 7.71 | [50] |
| 26 | <br>16a | training | 7.70 | [48] |
| 27 | <br>24c | training | 7.61 | [48] |
| 28 | <br>3d  | training | 7.49 | [50] |
| 29 | <br>2g  | training | 7.40 | [50] |
| 30 | <br>16c | training | 7.01 | [48] |
| 31 | <br>1a  | training | 6.80 | [50] |
| 32 | <br>2j  | training | 6.73 | [50] |
| 33 | <br>1i  | training | 6.53 | [50] |

|    |                                                                                                |          |      |      |
|----|------------------------------------------------------------------------------------------------|----------|------|------|
| 34 | 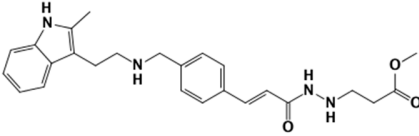 <p>13d</p>   | training | 6.51 | [48] |
| 35 |  <p>2h</p>    | training | 6.25 | [50] |
| 36 |  <p>16b</p>   | training | 6.17 | [48] |
| 37 |  <p>1k</p>    | training | 6.05 | [50] |
| 38 |  <p>1f</p>  | training | 6.04 | [50] |
| 39 |  <p>1d</p>  | training | 5.81 | [50] |
| 40 |  <p>11m</p> | test     | 9.29 | [46] |
| 41 |  <p>16d</p> | test     | 9.24 | [46] |
| 42 |  <p>16g</p> | test     | 9.21 | [46] |

|                 |                                                                                                |      |      |      |
|-----------------|------------------------------------------------------------------------------------------------|------|------|------|
| 43              | 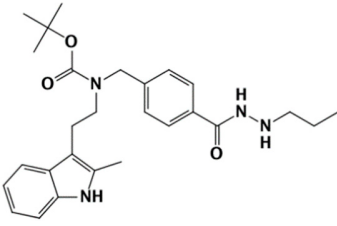 <p>15a</p>   | test | 7.90 | [48] |
| 44              |  <p>12a</p>   | test | 7.78 | [48] |
| 45              |  <p>13c</p>   | test | 7.46 | [48] |
| 46              |  <p>24b</p> | test | 7.31 | [48] |
| 47<br>(SR-3558) |  <p>1e</p>  | test | 7.17 | [50] |
| 48              |  <p>2f</p>  | test | 7.16 | [50] |
| 49              |  <p>15c</p> | test | 7.11 | [48] |
| 50              |  <p>2m</p>  | test | 7.07 | [50] |

|    |                                                                                            |      |      |      |
|----|--------------------------------------------------------------------------------------------|------|------|------|
| 51 | 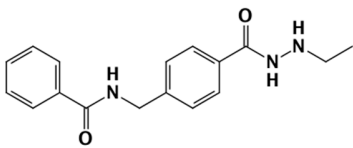<br>2l    | test | 6.73 | [50] |
| 52 | <br>1c    | test | 6.51 | [50] |
| 53 | <br>2i    | test | 5.96 | [50] |
| 54 | <br>1b    | test | 5.87 | [50] |
| 55 | <br>2a   | test | 5.81 | [50] |
| 56 | <br>1h  | test | 5.72 | [50] |
| 57 | <br>15b | In.  | 5.30 | [48] |
| 58 | <br>1g  | In.  | 5.30 | [50] |
| 59 | <br>13b | In.  | 5.28 | [48] |

|    |                                                                                         |     |       |      |
|----|-----------------------------------------------------------------------------------------|-----|-------|------|
| 60 | 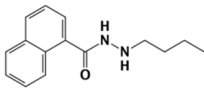<br>1j | In. | <5.00 | [50] |
| 61 | <br>2b | In. | <5.00 | [50] |
| 62 | <br>2c | In. | <5.00 | [50] |
| 63 | <br>2k | In. | <5.00 | [50] |

**Table S2.** Prediction values of the best atom-based QSAR model generated for training set, test set and inactive set for HDAC3

| Compound number | Compound name in original article | Class    | HDAC3 experimental pIC <sub>50</sub> | Prediction of atom-based-QSAR (pIC <sub>50</sub> ) | Ref. |
|-----------------|-----------------------------------|----------|--------------------------------------|----------------------------------------------------|------|
| 1               | 16h                               | training | 9.55                                 | 8.69                                               | [46] |
| 2               | 13a                               | training | 9.55                                 | 9.55                                               | [48] |
| 3               | 11i                               | training | 9.42                                 | 9.07                                               | [46] |
| 4               | 11h                               | training | 9.36                                 | 9.39                                               | [46] |
| 5               | 16f                               | training | 9.21                                 | 9.11                                               | [46] |
| 6               | 16b                               | training | 9.18                                 | 9.12                                               | [46] |
| 7               | 16e                               | training | 9.08                                 | 9.11                                               | [46] |
| 8               | 11n                               | training | 9.07                                 | 9.22                                               | [46] |
| 9               | 11d                               | training | 9.05                                 | 9.02                                               | [46] |
| 10              | 3b                                | training | 9.02                                 | 8.43                                               | [50] |
| 11              | 11e                               | training | 8.99                                 | 8.88                                               | [46] |
| 12              | 11l                               | training | 8.88                                 | 8.82                                               | [46] |
| 13              | 16c                               | training | 8.88                                 | 9.42                                               | [46] |
| 14              | 11k                               | training | 8.84                                 | 8.78                                               | [46] |
| 15              | 11c                               | training | 8.83                                 | 8.91                                               | [46] |
| 16              | 11f                               | training | 8.81                                 | 8.82                                               | [46] |
| 17              | 16a                               | training | 8.79                                 | 9.09                                               | [46] |
| 18              | 11b                               | training | 8.75                                 | 8.82                                               | [46] |
| 19              | 11g                               | training | 8.69                                 | 8.93                                               | [46] |
| 20              | 2d                                | training | 8.46                                 | 7.97                                               | [50] |
| 21              | 3c                                | training | 8.44                                 | 7.78                                               | [50] |
| 22              | 24a                               | training | 8.21                                 | 7.84                                               | [48] |



|    |     |          |      |      |      |
|----|-----|----------|------|------|------|
| 23 | 1l  | training | 8.07 | 8.18 | [50] |
| 24 | 2e  | training | 7.73 | 7.92 | [50] |
| 25 | 3a  | training | 7.71 | 7.85 | [50] |
| 26 | 16a | training | 7.70 | 7.73 | [48] |
| 27 | 24c | training | 7.61 | 7.08 | [48] |
| 28 | 3d  | training | 7.49 | 7.03 | [50] |
| 29 | 2g  | training | 7.40 | 7.31 | [50] |
| 30 | 16c | training | 7.01 | 7.13 | [48] |
| 31 | 1a  | training | 6.80 | 6.46 | [50] |
| 32 | 2j  | training | 6.73 | 6.96 | [50] |
| 33 | 1i  | training | 6.53 | 6.67 | [50] |
| 34 | 13d | training | 6.51 | 6.79 | [48] |
| 35 | 2h  | training | 6.25 | 6.40 | [50] |
| 36 | 16b | training | 6.17 | 6.20 | [48] |
| 37 | 1k  | training | 6.05 | 5.97 | [50] |
| 38 | 1f  | training | 6.04 | 6.22 | [50] |
| 39 | 1d  | training | 5.81 | 6.03 | [50] |
| 40 | 11m | test     | 9.29 | 8.69 | [46] |
| 41 | 16d | test     | 9.24 | 8.87 | [46] |
| 42 | 16g | test     | 9.21 | 9.14 | [46] |
| 43 | 15a | test     | 7.90 | 8.43 | [48] |
| 44 | 12a | test     | 7.78 | 7.13 | [48] |
| 45 | 13c | test     | 7.46 | 7.17 | [48] |
| 46 | 24b | test     | 7.31 | 7.65 | [48] |
| 47 | 1e  | test     | 7.17 | 6.92 | [50] |
| 48 | 2f  | test     | 7.16 | 7.54 | [50] |
| 49 | 15c | test     | 7.11 | 7.96 | [48] |

|    |     |          |       |      |      |
|----|-----|----------|-------|------|------|
| 50 | 2m  | test     | 7.07  | 7.81 | [50] |
| 51 | 2l  | test     | 6.73  | 7.88 | [50] |
| 52 | 1c  | test     | 6.51  | 7.32 | [50] |
| 53 | 2i  | test     | 5.96  | 7.85 | [50] |
| 54 | 1b  | test     | 5.87  | 6.19 | [50] |
| 55 | 2a  | test     | 5.81  | 8.08 | [50] |
| 56 | 1h  | test     | 5.72  | 6.74 | [50] |
| 57 | 15b | inactive | 5.30  | 7.54 | [48] |
| 58 | 1g  | inactive | 5.30  | 6.36 | [50] |
| 59 | 13b | inactive | 5.28  | 7.56 | [48] |
| 60 | 1j  | inactive | <5.00 | 6.11 | [50] |
| 61 | 2b  | inactive | <5.00 | 7.96 | [50] |
| 62 | 2c  | inactive | <5.00 | 7.97 | [50] |
| 63 | 2k  | inactive | <5.00 | 7.19 | [50] |

**Table S3.** Prediction values of the best BFE model generated for training set, test set and inactive set for HDAC3

| <b>Compound number</b> | <b>Compound ID original article</b> | <b>Class</b> | <b>Docking score</b> | <b>HDAC3 experimental pIC<sub>50</sub></b> | <b>Prediction of BFE MODEL19_1 (pIC<sub>50</sub>)</b> | <b>Ref.</b> |
|------------------------|-------------------------------------|--------------|----------------------|--------------------------------------------|-------------------------------------------------------|-------------|
| 1                      | 16h                                 | training     | -8.96                | 9.55                                       | 8.64                                                  | [46]        |
| 2                      | 13a                                 | training     | -9.87                | 9.55                                       | 9.38                                                  | [48]        |
| 3                      | 11i                                 | training     | -9.18                | 9.42                                       | 9.12                                                  | [46]        |
| 4                      | 11h                                 | training     | -10.10               | 9.36                                       | 9.19                                                  | [46]        |
| 5                      | 16f                                 | training     | -9.29                | 9.21                                       | 9.08                                                  | [46]        |
| 6                      | 16b                                 | training     | -10.35               | 9.18                                       | 9.60                                                  | [46]        |
| 7                      | 16e                                 | training     | -9.13                | 9.08                                       | 8.18                                                  | [46]        |
| 8                      | 11n                                 | training     | -9.38                | 9.07                                       | 8.95                                                  | [46]        |
| 9                      | 11d                                 | training     | -9.08                | 9.05                                       | 9.24                                                  | [46]        |
| 10                     | 3b                                  | training     | -9.55                | 9.02                                       | 8.97                                                  | [50]        |
| 11                     | 11e                                 | training     | -9.25                | 8.99                                       | 9.02                                                  | [46]        |
| 12                     | 11l                                 | training     | -9.49                | 8.88                                       | 8.85                                                  | [46]        |
| 13                     | 16c                                 | training     | -10.16               | 8.88                                       | 8.75                                                  | [46]        |
| 14                     | 11k                                 | training     | -10.25               | 8.84                                       | 9.14                                                  | [46]        |
| 15                     | 11c                                 | training     | -9.34                | 8.83                                       | 8.87                                                  | [46]        |
| 16                     | 11f                                 | training     | -9.40                | 8.81                                       | 8.90                                                  | [46]        |
| 17                     | 16a                                 | training     | -10.35               | 8.79                                       | 8.41                                                  | [46]        |
| 18                     | 11b                                 | training     | -9.27                | 8.75                                       | 8.91                                                  | [46]        |
| 19                     | 11g                                 | training     | -9.70                | 8.69                                       | 8.41                                                  | [46]        |
| 20                     | 2d                                  | training     | -8.88                | 8.46                                       | 8.59                                                  | [50]        |
| 21                     | 3c                                  | training     | -9.97                | 8.44                                       | 8.72                                                  | [50]        |
| 22                     | 24a                                 | training     | -6.71                | 8.21                                       | 7.39                                                  | [48]        |
| 23                     | 11                                  | training     | -9.26                | 8.07                                       | 8.15                                                  | [50]        |

|    |     |          |        |      |      |      |
|----|-----|----------|--------|------|------|------|
| 24 | 2e  | training | -8.88  | 7.73 | 7.51 | [50] |
| 25 | 3a  | training | -8.88  | 7.71 | 8.49 | [50] |
| 26 | 16a | training | -8.85  | 7.70 | 7.65 | [48] |
| 27 | 24c | training | -6.54  | 7.61 | 7.12 | [48] |
| 28 | 3d  | training | -10.68 | 7.49 | 7.99 | [50] |
| 29 | 2g  | training | -9.63  | 7.40 | 7.62 | [50] |
| 30 | 16c | training | -7.18  | 7.01 | 6.76 | [48] |
| 31 | 1a  | training | -8.30  | 6.80 | 7.19 | [50] |
| 32 | 2j  | training | -8.97  | 6.73 | 7.22 | [50] |
| 33 | 1i  | training | -8.56  | 6.53 | 6.89 | [50] |
| 34 | 13d | training | -8.73  | 6.51 | 7.23 | [48] |
| 35 | 2h  | training | -8.12  | 6.25 | 5.77 | [50] |
| 36 | 16b | training | -8.45  | 6.17 | 6.25 | [48] |
| 37 | 1k  | training | -8.24  | 6.05 | 6.00 | [50] |
| 38 | 1f  | training | -8.54  | 6.04 | 6.53 | [50] |
| 39 | 1d  | training | -8.70  | 5.81 | 5.70 | [50] |
| 40 | 11m | test     | -9.31  | 9.29 | 8.60 | [46] |
| 41 | 16d | test     | -9.76  | 9.24 | 9.75 | [46] |
| 42 | 16g | test     | -9.13  | 9.21 | 9.37 | [46] |
| 43 | 15a | test     | -8.65  | 7.90 | 8.53 | [48] |
| 44 | 12a | test     | -8.65  | 7.78 | 8.10 | [48] |
| 45 | 13c | test     | -8.84  | 7.46 | 7.42 | [48] |
| 46 | 24b | test     | -7.16  | 7.31 | 8.06 | [48] |
| 47 | 1e  | test     | -7.20  | 7.17 | 7.85 | [50] |
| 48 | 2f  | test     | -8.80  | 7.16 | 8.12 | [50] |
| 49 | 15c | test     | -8.58  | 7.11 | 6.30 | [48] |
| 50 | 2m  | test     | -9.50  | 7.07 | 7.32 | [50] |

|    |     |          |       |       |      |      |
|----|-----|----------|-------|-------|------|------|
| 51 | 2l  | test     | -7.65 | 6.73  | 7.56 | [50] |
| 52 | 1c  | test     | -7.53 | 6.51  | 6.89 | [50] |
| 53 | 2i  | test     | -8.67 | 5.96  | 6.19 | [50] |
| 54 | 1b  | test     | -8.71 | 5.87  | 6.41 | [50] |
| 55 | 2a  | test     | -9.09 | 5.81  | 6.27 | [50] |
| 56 | 1h  | test     | -6.94 | 5.72  | 6.42 | [50] |
| 57 | 15b | inactive | -7.28 | 5.30  | 5.39 | [48] |
| 58 | 1g  | inactive | -7.59 | 5.30  | 5.85 | [50] |
| 59 | 13b | inactive | -9.42 | 5.28  | 4.79 | [48] |
| 60 | 1j  | inactive | -4.17 | <5.00 | 4.43 | [50] |
| 61 | 2b  | inactive | -9.60 | <5.00 | 6.15 | [50] |
| 62 | 2c  | inactive | -9.20 | <5.00 | 5.48 | [50] |
| 63 | 2k  | inactive | -7.49 | <5.00 | 5.68 | [50] |

**Table S4.** 2D chemical structures and biological data of tested compounds.

| Compound number | Molecular structure and ID in the original publication [53]                                   | Class | HDAC3 experimental pIC <sub>50</sub> | Ref. |
|-----------------|-----------------------------------------------------------------------------------------------|-------|--------------------------------------|------|
| 64              | 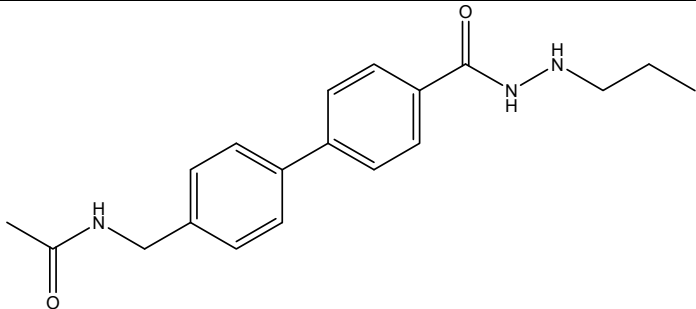 <p>7a</p>   | Test  | 7.04                                 | [53] |
| 65              |  <p>7b</p> | Test  | 6.46                                 | [53] |
| 66              |  <p>7c</p> | Test  | 5.82                                 | [53] |
| 67              |  <p>7d</p> | Test  | <5.00                                | [53] |

|    |                                                                                                |      |                     |      |
|----|------------------------------------------------------------------------------------------------|------|---------------------|------|
| 68 | 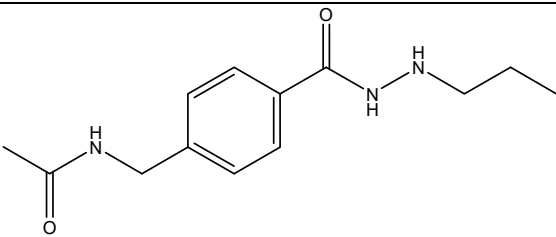 <p>7e</p>    | Test | 5.80                | [53] |
| 69 |  <p>7f</p>    | Test | <5.00               | [53] |
| 70 |  <p>7g</p>   | Test | <5.00               | [53] |
| 71 |  <p>7h</p>  | Test | 9%@1uM,<br>42%@10uM | [53] |
| 72 |  <p>28a</p> | Test | 7.37                | [53] |

|    |                                                                                                |      |                      |      |
|----|------------------------------------------------------------------------------------------------|------|----------------------|------|
| 73 | 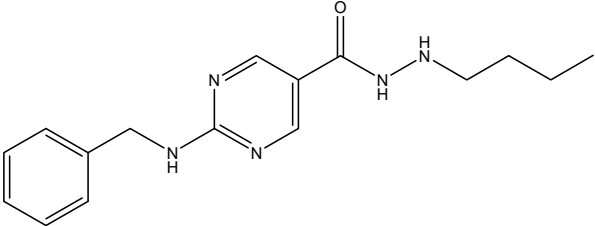 <p>28b</p>   | Test | 6.70                 | [53] |
| 74 |  <p>28c</p>  | Test | 41%@1uM,<br>87%@10uM | [53] |
| 75 |  <p>28d</p>  | Test | 7.09                 | [53] |
| 76 |  <p>28e</p> | Test | 7.22                 | [53] |
| 77 |  <p>28f</p> | Test | 7.43                 | [53] |
| 78 |  <p>28g</p> | Test | 7.24                 | [53] |



|    |                                                                                                |      |       |      |
|----|------------------------------------------------------------------------------------------------|------|-------|------|
| 79 | 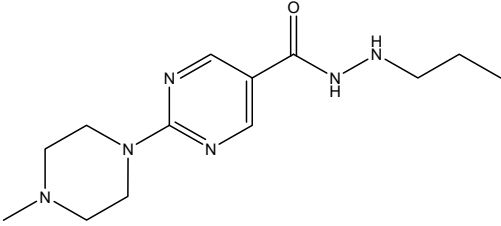 <p>28h</p>   | Test | 6.92  | [53] |
| 80 |  <p>28i</p>  | Test | 6.96  | [53] |
| 81 |  <p>28j</p>  | Test | <5.00 | [53] |
| 82 |  <p>28k</p> | Test | 5.14  | [53] |
| 83 |  <p>28l</p> | Test | 5.52  | [53] |
| 84 |  <p>28m</p> | Test | 5.07  | [53] |

|    |                                                                                                 |      |      |      |
|----|-------------------------------------------------------------------------------------------------|------|------|------|
| 85 | 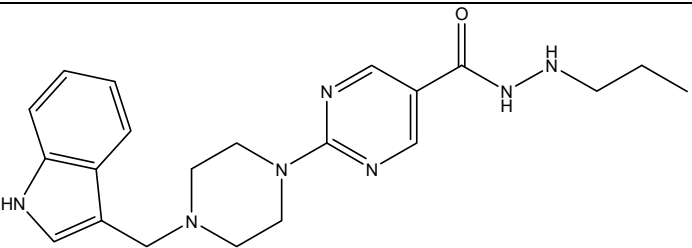 <p>40a</p>    | Test | 7.52 | [53] |
| 86 |  <p>40b</p>   | Test | 7.00 | [53] |
| 87 |  <p>40c</p>  | Test | 6.52 | [53] |
| 88 |  <p>40d</p> | Test | 6.00 | [53] |
| 89 |  <p>40e</p>  | Test | 5.85 | [53] |

**Table S5.** Prediction values of the best atom-based QSAR model generated for training set, test set and inactive set for HDAC3

| Compound number | Compound ID original article | Class | HDAC3 experimental pIC <sub>50</sub> | Prediction of atom-based-QSAR (pIC <sub>50</sub> ) | Ref. |
|-----------------|------------------------------|-------|--------------------------------------|----------------------------------------------------|------|
| 64              | 7a                           | Test  | 7.04                                 | 7.03                                               | [53] |
| 65              | 7b                           | Test  | 6.46                                 | 6.59                                               | [53] |
| 66              | 7c                           | Test  | 5.82                                 | 6.57                                               | [53] |
| 67              | 7d                           | Test  | <5.00                                | 6.43                                               | [53] |
| 68              | 7e                           | Test  | 5.80                                 | 7.25                                               | [53] |
| 69              | 7f                           | Test  | <5.00                                | 7.05                                               | [53] |
| 70              | 7g                           | Test  | <5.00                                | 6.98                                               | [53] |
| 71              | 7h                           | Test  | 9%@1uM                               | 6.82                                               | [53] |
| 72              | 28a                          | Test  | 7.37                                 | 7.85                                               | [53] |
| 73              | 28b                          | Test  | 6.70                                 | 7.29                                               | [53] |
| 74              | 28c                          | Test  | 41%@1uM                              | 7.39                                               | [53] |
| 75              | 28d                          | Test  | 7.09                                 | 7.82                                               | [53] |
| 76              | 28e                          | Test  | 7.22                                 | 7.12                                               | [53] |
| 77              | 28f                          | Test  | 7.43                                 | 7.96                                               | [53] |
| 78              | 28g                          | Test  | 7.24                                 | 7.03                                               | [53] |
| 79              | 28h                          | Test  | 6.92                                 | 6.80                                               | [53] |
| 80              | 28i                          | Test  | 6.96                                 | 8.10                                               | [53] |
| 81              | 28j                          | Test  | <5.00                                | 6.54                                               | [53] |
| 82              | 28k                          | Test  | 5.14                                 | 6.86                                               | [53] |
| 83              | 28l                          | Test  | 5.52                                 | 7.25                                               | [53] |
| 84              | 28m                          | Test  | 5.07                                 | 7.61                                               | [53] |
| 85              | 40a                          | Test  | 7.52                                 | 7.63                                               | [53] |
| 86              | 40b                          | Test  | 7.00                                 | 7.18                                               | [53] |

|    |     |      |      |      |      |
|----|-----|------|------|------|------|
| 87 | 40c | Test | 6.52 | 6.52 | [53] |
| 88 | 40d | Test | 6.00 | 7.40 | [53] |
| 89 | 40e | Test | 5.85 | 7.13 | [53] |

**Table S6.** Prediction values of the best BFE model generated for tested compounds for HDAC3

| Compound number | Compound ID original article | Class | Docking score | HDAC3 experimental pIC <sub>50</sub> | Prediction of BFE MODEL19_1 (pIC <sub>50</sub> ) | Ref. |
|-----------------|------------------------------|-------|---------------|--------------------------------------|--------------------------------------------------|------|
| 64              | 7a                           | Test  | -9.24         | 7.04                                 | 7.16                                             | [53] |
| 65              | 7b                           | Test  | -9.48         | 6.46                                 | 6.89                                             | [53] |
| 66              | 7c                           | Test  | -9.48         | 5.82                                 | 6.36                                             | [53] |
| 67              | 7d                           | Test  | -7.33         | <5.00                                | 5.41                                             | [53] |
| 68              | 7e                           | Test  | -6.87         | 5.80                                 | 6.69                                             | [53] |
| 69              | 7f                           | Test  | -5.42         | <5.00                                | 5.07                                             | [53] |
| 70              | 7g                           | Test  | -6.21         | <5.00                                | 3.92                                             | [53] |
| 71              | 7h                           | Test  | -3.06         | 9%@1uM                               | 0.24                                             | [53] |
| 72              | 28a                          | Test  | -6.01         | 7.37                                 | 7.60                                             | [53] |
| 73              | 28b                          | Test  | -6.35         | 6.70                                 | 6.68                                             | [53] |
| 74              | 28c                          | Test  | -6.28         | 41%@1uM                              | 7.29                                             | [53] |
| 75              | 28d                          | Test  | -7.77         | 7.09                                 | 8.06                                             | [53] |
| 76              | 28e                          | Test  | -8.13         | 7.22                                 | 6.86                                             | [53] |
| 77              | 28f                          | Test  | -8.12         | 7.43                                 | 7.06                                             | [53] |
| 78              | 28g                          | Test  | -7.90         | 7.24                                 | 7.98                                             | [53] |
| 79              | 28h                          | Test  | -8.36         | 6.92                                 | 6.32                                             | [53] |
| 80              | 28i                          | Test  | -8.09         | 6.96                                 | 7.42                                             | [53] |
| 81              | 28j                          | Test  | -4.99         | <5.00                                | 1.65                                             | [53] |
| 82              | 28k                          | Test  | -4.14         | 5.14                                 | 0.61                                             | [53] |
| 83              | 28l                          | Test  | -5.41         | 5.52                                 | 3.26                                             | [53] |
| 84              | 28m                          | Test  | -4.66         | 5.07                                 | 2.69                                             | [53] |
| 85              | 40a                          | Test  | -7.80         | 7.52                                 | 7.64                                             | [53] |
| 86              | 40b                          | Test  | -8.01         | 7.00                                 | 7.29                                             | [53] |

|    |     |      |       |      |      |      |
|----|-----|------|-------|------|------|------|
| 87 | 40c | Test | -7.59 | 6.52 | 6.86 | [53] |
| 88 | 40d | Test | -7.10 | 6.00 | 6.13 | [53] |
| 89 | 40e | Test | -7.76 | 5.85 | 6.11 | [53] |
